# Supplementary material for: Reducing bias in population and landscape genetic inferences: the effects of sampling related individuals and multiple life stages
Source: PeerJ. 2016 Mar 14;4:e1813. doi: 10.7717/peerj.1813 (PMC4793335; doi:10.7717/peerj.1813)
Supplement: Supplemental Information 1 [file peerj-04-1813-s001.docx]

**Supplement** **1.** Number of samples collected per pond. Values in parentheses are the number of samples remaining after the removal of full siblings.

| **Pond** | **Adults** | **Embryos** | **Larvae** | **Combined life stages** | |
| --- | --- | --- | --- | --- | --- |
| 1 | 25 (23) | 24 (22) | 29 (23) | 78 (47) |
| 2 | 25 (21) | 19 (18) | – | 44 (33) |
| 3 | 25 (25) | 26 (23) | – | 51 (39) |
| 4 | 25 (21) | 25 (20) | 36 (22) | 86 (51) |
| 5 | 24 (18) | 27 (19) | 35 (21) | 86 (54) |
| Avg | 24.8 (21.6) | 24.2 (20.4) | 33.33 (22) | 69 (44.8) |
| SD | 0.45 (2.61) | 3.11 (2.07) | 3.79 (1.00) | 20.05 (8.67) |

**Supplement 2**. Summary statistics for microsatellite loci used in this study including number of individuals for which the microsatellite amplified (N), total number of alleles per locus (Na), observed heterozygosity (Ho), and expected heterozygosity (He).

| **Locus** | **N** | **Na** | **Ho** | **He** | **P-value** |
| --- | --- | --- | --- | --- | --- |
| Am_56 | 279 | 3 | 0.419 | 0.425 | 0.885 |
| Am_34 | 279 | 9 | 0.731 | 0.805 | 0.049 |
| Am_62 | 279 | 3 | 0.355 | 0.381 | 0.142 |
| Am_4 | 279 | 7 | 0.215 | 0.222 | 0.209 |
| Am_9 | 279 | 4 | 0.516 | 0.507 | 0.663 |
| Am_39 | 279 | 4 | 0.559 | 0.521 | 0.617 |
| Am_21 | 279 | 5 | 0.38 | 0.41 | 0.058 |
| Am_10 | 279 | 7 | 0.649 | 0.682 | 0.165 |
| Am_29 | 279 | 4 | 0.161 | 0.174 | 0.057 |
| Am_30 | 278 | 6 | 0.683 | 0.706 | 0.439 |
| Am_38 | 277 | 3 | 0.542 | 0.523 | 0.061 |
| Am_3 | 277 | 14 | 0.784 | 0.817 | 0.053 |
| Am_55 | 279 | 3 | 0.452 | 0.477 | 0.349 |
| Am_7 | 279 | 7 | 0.667 | 0.628 | 0.222 |
| Am_37 | 277 | 5 | 0.7 | 0.705 | 0.058 |
